# Supplementary material for: Alpha-1 antitrypsin limits neutrophil extracellular trap disruption of airway epithelial barrier function
Source: PubMed Central journal article supplement (PMC9872031; doi:10.3389/fimmu.2022.1023553), 2023-01-10
Supplement: Table_1.pdf [file Table_1.pdf]

**Supplemental Table 1. NETs alter RNAs affecting apoptosis in human bronchial epithelia.** List of differentially expressed genes associated with apoptosis found by RNA sequencing of HBE exposed to 5µg/ml NETs compared to PBS for 18h. Data analyzed using IPA ( $p=1.07e-13$ , experiments=3, HBE donors=3, NET donors=3).

| Apoptosis      |             |                |             |                |             |
|----------------|-------------|----------------|-------------|----------------|-------------|
| Symbol         | Fold Change | Symbol         | Fold Change | Symbol         | Fold Change |
| <i>IL1RL1</i>  | 104.7046    | <i>HDAC9</i>   | 5.019643    | <i>PBX1</i>    | -2.89936    |
| <i>CD200</i>   | 49.66355    | <i>VAV1</i>    | 4.949888    | <i>PTGS1</i>   | -3.01138    |
| <i>MMP9</i>    | 49.35035    | <i>TIMP2</i>   | 4.81805     | <i>LGR4</i>    | -3.01154    |
| <i>SEMA7A</i>  | 39.21162    | <i>PHLDA2</i>  | 4.794256    | <i>PTTG1</i>   | -3.09511    |
| <i>CEACAM1</i> | 22.26556    | <i>NOG</i>     | 4.709203    | <i>WNT5A</i>   | -3.24799    |
| <i>PLAUR</i>   | 14.30711    | <i>PIK3AP1</i> | 4.528828    | <i>WNT3A</i>   | -3.59439    |
| <i>RASSF2</i>  | 13.18982    | <i>IL32</i>    | 4.515641    | <i>FKBP5</i>   | -3.85641    |
| <i>PLAU</i>    | 10.91761    | <i>TLR2</i>    | 4.487772    | <i>PIK3R1</i>  | -3.97341    |
| <i>MMP10</i>   | 9.987298    | <i>POLB</i>    | 4.475649    | <i>ID1</i>     | -3.97642    |
| <i>TIAM1</i>   | 9.666262    | <i>SOX9</i>    | 4.434872    | <i>JAG2</i>    | -4.05528    |
| <i>GPR132</i>  | 8.60728     | <i>CLCF1</i>   | 4.37477     | <i>FGFR3</i>   | -4.06072    |
| <i>GDF15</i>   | 8.016345    | <i>EREG</i>    | 4.200381    | <i>ID3</i>     | -4.20011    |
| <i>TREM1</i>   | 7.543849    | <i>CCND1</i>   | 3.948307    | <i>VAV3</i>    | -4.31285    |
| <i>IL1RN</i>   | 7.038242    | <i>MAP4K4</i>  | 3.876084    | <i>ANGPT1</i>  | -4.32759    |
| <i>ELOVL4</i>  | 6.957872    | <i>PTGS2</i>   | 3.831697    | <i>HSD11B2</i> | -4.41233    |
| <i>DKK1</i>    | 6.847217    | <i>CEACAM5</i> | 3.775852    | <i>SDC2</i>    | -4.5023     |
| <i>NT5E</i>    | 6.753523    | <i>TGFB1</i>   | 3.726483    | <i>SNAI2</i>   | -4.71535    |
| <i>GLIPR1</i>  | 6.489568    | <i>KRT17</i>   | 3.520094    | <i>CAV1</i>    | -5.04368    |
| <i>PHLDA1</i>  | 6.403348    | <i>RASD1</i>   | 3.487722    | <i>TIMP3</i>   | -5.35201    |
| <i>PLK3</i>    | 6.377526    | <i>PIK3IP1</i> | 3.429813    | <i>NGFR</i>    | -5.55712    |
| <i>OSBP2</i>   | 5.996882    | <i>ITGA1</i>   | 3.152443    | <i>MT3</i>     | -6.51282    |
| <i>ADAM8</i>   | 5.705564    | <i>F3</i>      | 3.082455    | <i>APLN</i>    | -7.14273    |
| <i>FST</i>     | 5.428863    | <i>KIFC3</i>   | 2.944804    | <i>GAS1</i>    | -7.24106    |
| <i>EHD3</i>    | 5.288924    | <i>TXNRD1</i>  | 2.805253    | <i>ID2</i>     | -7.33517    |
| <i>SPHK1</i>   | 5.132752    | <i>SCD</i>     | -2.69065    | <i>TP63</i>    | -7.46925    |
| <i>MMP1</i>    | 5.041066    | <i>PTHLH</i>   | -2.78389    | <i>DLL1</i>    | -9.40422    |
| <i>CCL5</i>    | 5.024486    | <i>TRIM2</i>   | -2.8052     |                |             |
| <i>IRAK2</i>   | 5.024247    | <i>PDCD4</i>   | -2.87253    |                |             |
