# Supplementary material for: Alpha-1 antitrypsin limits neutrophil extracellular trap disruption of airway epithelial barrier function
Source: PubMed Central journal article supplement (PMC9872031; doi:10.3389/fimmu.2022.1023553), 2023-01-10
Supplement: Table_2.pdf [file Table_2.pdf]

**Supplemental Table 2. NETs alter epithelial cell junction RNAs.** List of functionally enriched RNAs for cellular components of anchored junctions and tight junctions found by RNA sequencing of HBE exposed to 5µg/ml NETs compared to PBS for 18h. Data analyzed using ToppGene (experiments=3, HBE donors=3, NET donors=3).

| Cell Junction Organization |              |
|----------------------------|--------------|
| Symbol                     | Fold Change  |
| <i>ACTB</i>                | 2.89996469   |
| <i>KIFC3</i>               | 2.944804134  |
| <i>CLDN4</i>               | 3.207103512  |
| <i>TGFB1</i>               | 3.726483192  |
| <i>MAP4K4</i>              | 3.876084105  |
| <i>LAMB3</i>               | 4.014288083  |
| <i>TLR2</i>                | 4.487771729  |
| <i>ESAM</i>                | 4.649265569  |
| <i>EPHB3</i>               | 4.978859764  |
| <i>DKK1</i>                | 6.847217229  |
| <i>LAMC2</i>               | 8.371985395  |
| <i>TIAM1</i>               | 9.666262173  |
| <i>ARHGAP22</i>            | -5.618308079 |
| <i>CAV1</i>                | -5.043682033 |
| <i>WNT4</i>                | -4.864411143 |
| <i>CLDN8</i>               | -4.838474606 |
| <i>SNAI2</i>               | -4.715354949 |
| <i>PIK3R1</i>              | -3.973412632 |
| <i>MTSS1</i>               | -3.870409255 |
| <i>WNT3A</i>               | -3.594393098 |
| <i>WNT5A</i>               | -3.247994985 |
